# Supplementary material
Source: PubMed Central journal article supplement (PMC6811843)
Supplement: ao9b01884_si_001.pdf [file ao9b01884_si_001.pdf]

## Supporting Information

### **Solvent-Free Fabrication of an Elastomeric Epoxy Resin Using Glycol Lignin from Japanese Cedar**

Kenta Ono,<sup>†</sup> Osamu Tanaike,\*<sup>†</sup> Ryo Ishii,<sup>†</sup> Takashi Nakamura,<sup>†</sup> Kazuhiro Shikinaka,<sup>†</sup> Takeo Ebina,<sup>†</sup> Thi Thi Nge<sup>‡</sup> and Tatsuhiko Yamada<sup>‡</sup>

<sup>†</sup> Research Institute for Chemical Process Technology, National Institute of Advanced Industrial Science and Technology (AIST), 4-2-1 Nigatake Miyagino-ku, Sendai, Miyagi 983-8551, Japan

<sup>‡</sup> Center for Advanced Materials, Forestry and Forest Products Research Institute, 1 Matsunosato, Tsukuba, Ibaraki 305-8687, Japan

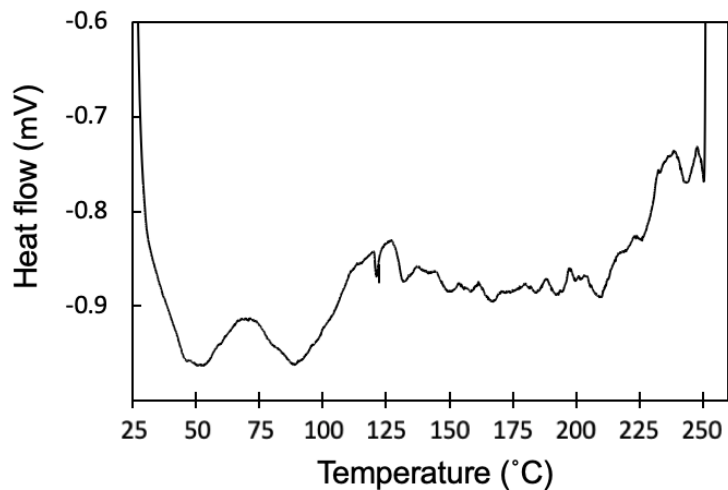

**Figure S1.** DSC profiles of the uncured GL-epoxy resin (GL400 content of 71.4 wt%) from room temperature to 250 °C (heating rate 5 °C/min) under a stream of N<sub>2</sub>.

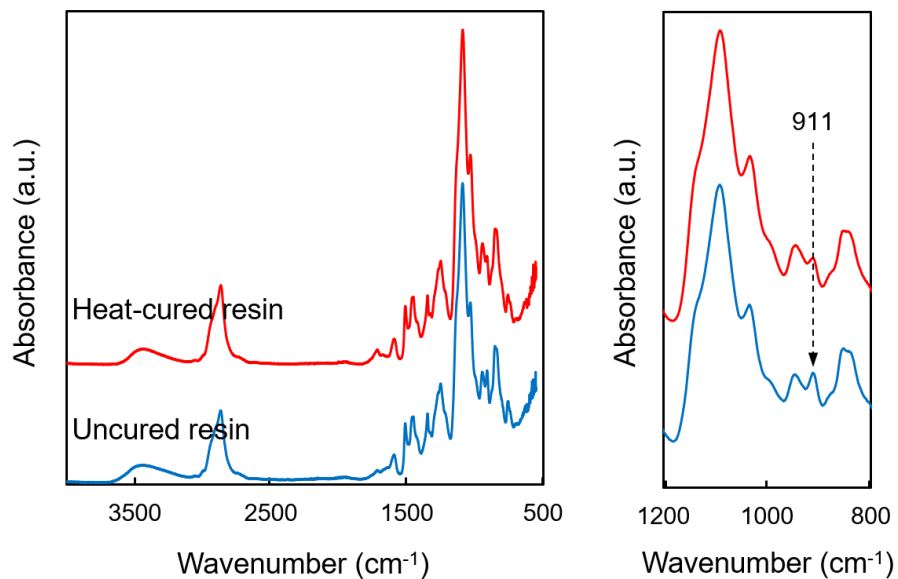

**Figure S2.** FTIR spectra (including detail of the epoxide absorption at 911 cm<sup>-1</sup>) of the uncured GL-epoxy resin and heat-cured GL-epoxy resin (GL400 content of 41.2 wt%).
